# Supplementary material for: Optical Rotation—A Reliable Parameter for Authentication of Honey?
Source: MDPI journal article supplement (doi:10.3390/molecules27248916), 2022-12-15
Supplement: s1 [file s1]

**Table S1.** Correlation matrix presenting the Pearson's coefficients (r) for 42 examined components *vs.* optical rotation angle.

|                   | [ $\alpha$ ]   | G     | F     | Gb    | IMa         | IMu   | Kb          | Lu          | Ma          | Mu          | Ng          | Su    | $\alpha\alpha$ Tr | $\alpha\beta$ Tr | Tru   | Tu    | Er    | 1-Ks  | Mr    | Mz          | Pa   | Rf |
|-------------------|----------------|-------|-------|-------|-------------|-------|-------------|-------------|-------------|-------------|-------------|-------|-------------------|------------------|-------|-------|-------|-------|-------|-------------|------|----|
| [ $\alpha$ ]      | 1              |       |       |       |             |       |             |             |             |             |             |       |                   |                  |       |       |       |       |       |             |      |    |
| G                 | <i>0.09*</i>   | 1     |       |       |             |       |             |             |             |             |             |       |                   |                  |       |       |       |       |       |             |      |    |
| F                 | <b>-0.89**</b> | -0.17 | 1     |       |             |       |             |             |             |             |             |       |                   |                  |       |       |       |       |       |             |      |    |
| Gb                | -0.22          | -0.20 | 0.28  | 1     |             |       |             |             |             |             |             |       |                   |                  |       |       |       |       |       |             |      |    |
| IMa               | -0.20          | -0.45 | 0.23  | 0.09  | 1           |       |             |             |             |             |             |       |                   |                  |       |       |       |       |       |             |      |    |
| IMu               | -0.19          | -0.37 | 0.22  | 0.01  | 0.71        | 1     |             |             |             |             |             |       |                   |                  |       |       |       |       |       |             |      |    |
| Kb                | -0.54          | -0.29 | 0.52  | 0.14  | 0.67        | 0.57  | 1           |             |             |             |             |       |                   |                  |       |       |       |       |       |             |      |    |
| Lu                | -0.42          | -0.33 | 0.37  | -0.03 | 0.76        | 0.60  | 0.79        | 1           |             |             |             |       |                   |                  |       |       |       |       |       |             |      |    |
| Ma                | <b>0.88</b>    | 0.03  | -0.69 | -0.19 | -0.32       | -0.29 | -0.60       | -0.49       | 1           |             |             |       |                   |                  |       |       |       |       |       |             |      |    |
| Mu                | -0.44          | -0.41 | 0.39  | 0.05  | <b>0.87</b> | 0.70  | 0.77        | <b>0.86</b> | -0.51       | 1           |             |       |                   |                  |       |       |       |       |       |             |      |    |
| Ng                | -0.50          | -0.33 | 0.45  | 0.20  | <b>0.82</b> | 0.57  | <b>0.81</b> | 0.80        | -0.53       | <b>0.89</b> | 1           |       |                   |                  |       |       |       |       |       |             |      |    |
| Su                | 0.15           | -0.36 | -0.39 | 0.03  | -0.17       | -0.12 | -0.18       | -0.21       | -0.09       | -0.19       | -0.25       | 1     |                   |                  |       |       |       |       |       |             |      |    |
| $\alpha\alpha$ Tr | -0.16          | 0.04  | 0.07  | 0.05  | 0.18        | 0.35  | 0.32        | 0.50        | -0.26       | 0.30        | 0.31        | -0.11 | 1                 |                  |       |       |       |       |       |             |      |    |
| $\alpha\beta$ Tr  | -0.58          | -0.45 | 0.50  | 0.09  | 0.76        | 0.52  | 0.74        | 0.77        | -0.57       | <b>0.86</b> | <b>0.90</b> | -0.14 | 0.27              | 1                |       |       |       |       |       |             |      |    |
| Tru               | -0.38          | -0.33 | 0.42  | 0.13  | <b>0.88</b> | 0.67  | <b>0.84</b> | <b>0.81</b> | -0.51       | 0.80        | 0.76        | -0.20 | 0.24              | 0.68             | 1     |       |       |       |       |             |      |    |
| Tu                | -0.62          | -0.42 | 0.56  | 0.10  | 0.66        | 0.48  | 0.66        | 0.67        | -0.53       | <b>0.82</b> | <b>0.80</b> | -0.22 | 0.16              | <b>0.88</b>      | 0.61  | 1     |       |       |       |             |      |    |
| Er                | -0.35          | -0.30 | 0.35  | 0.17  | 0.20        | 0.01  | 0.11        | 0.19        | -0.25       | 0.27        | 0.26        | -0.11 | 0.11              | 0.35             | 0.15  | 0.50  | 1     |       |       |             |      |    |
| 1-Ks              | -0.21          | -0.09 | 0.12  | -0.01 | 0.51        | 0.31  | 0.45        | 0.67        | -0.33       | 0.55        | 0.46        | -0.14 | 0.52              | 0.44             | 0.48  | 0.25  | 0.00  | 1     |       |             |      |    |
| Mr                | <b>0.89</b>    | 0.03  | -0.72 | -0.21 | -0.33       | -0.27 | -0.62       | -0.50       | <b>0.97</b> | -0.54       | -0.57       | -0.04 | -0.24             | -0.61            | -0.51 | -0.59 | -0.27 | -0.30 | 1     |             |      |    |
| Mz                | -0.07          | -0.13 | 0.06  | -0.02 | 0.11        | 0.23  | 0.07        | 0.21        | -0.13       | 0.14        | 0.11        | -0.06 | 0.60              | 0.10             | 0.10  | 0.10  | 0.43  | 0.37  | -0.08 | 1           |      |    |
| Pa                | -0.08          | -0.30 | 0.05  | 0.01  | 0.43        | 0.40  | 0.21        | 0.43        | -0.22       | 0.37        | 0.33        | 0.01  | 0.54              | 0.32             | 0.39  | 0.30  | 0.53  | 0.35  | -0.16 | <b>0.82</b> | 1    |    |
| Rf                | -0.48          | -0.55 | 0.38  | 0.11  | 0.67        | 0.49  | 0.59        | 0.67        | -0.55       | 0.74        | 0.67        | 0.12  | 0.22              | 0.78             | 0.61  | 0.66  | 0.28  | 0.59  | -0.58 | 0.27        | 0.43 | 1  |

\* Data without statistical significance at level  $p > 0.05$  are given in italics

\*\* High positive correlations ( $r > 0.8$ ) are highlighted in red, and strong negative correlations ( $r < -0.8$ ) - in blue.

**Table S2.** Honey and jam samples investigated

| Sample | Type     | Botanical origin | Geographical origin | Specific rotation<br>$[\alpha]_D^{20}$ |
|--------|----------|------------------|---------------------|----------------------------------------|
| dl1    | nectar   | diluted          | Bulgaria            | +7.2                                   |
| dl2    | honeydew | diluted          | Bulgaria            | +31.1                                  |
| dl3    | nectar   | diluted          | Romania             | +89.2                                  |
| dl4    | nectar   | diluted          | Romania             | +34.1                                  |
| dl5    | nectar   | diluted          | Romania             | +34.1                                  |
| dl6    | nectar   | diluted          | Romania             | +46.1                                  |
| dl7    | nectar   | diluted          | Bulgaria            | +39.3                                  |
| ch8    | mixed    | chestnut         | Bulgaria            | -11.5                                  |
| ch9    | mixed    | chestnut         | Bulgaria            | -3.2                                   |
| ch10   | mixed    | chestnut         | Bulgaria            | -2.5                                   |
| ch11   | mixed    | chestnut         | Bulgaria            | +18.4                                  |
| cf12   | honeydew | coniferous       | Bulgaria            | -6.3                                   |
| cf13   | honeydew | coniferous       | Italy               | +9.0                                   |
| cf14   | honeydew | coniferous       | Romania             | -8.1                                   |
| ok15   | honeydew | oak              | Bulgaria            | -9.7                                   |
| ok16   | honeydew | oak              | Bulgaria            | -11.3                                  |
| ok17   | honeydew | oak              | Bulgaria            | -10.4                                  |
| ok18   | honeydew | oak              | Bulgaria            | -2.9                                   |
| ok19   | honeydew | oak              | Bulgaria            | -7.4                                   |
| ok20   | honeydew | oak              | Bulgaria            | -8.6                                   |
| ok21   | honeydew | oak              | Bulgaria            | -10.6                                  |
| ok22   | honeydew | oak              | North Macedonia     | -0.2                                   |
| ok23   | honeydew | oak              | Romania             | -9.4                                   |
| ok24   | honeydew | oak              | Romania             | -4.6                                   |
| ts25   | nectar   | thistle          | Romania             | +2.5                                   |
| ts26   | nectar   | thistle          | Bulgaria            | -18.8                                  |
| tm27   | nectar   | thyme            | Bulgaria            | -8.3                                   |
| cr28   | nectar   | coriander        | Bulgaria            | -9.4                                   |
| rs29   | nectar   | rapeseed         | Bulgaria            | -11.2                                  |
| pf30   | nectar   | polyfloral       | Greece              | -16.9                                  |

|             |        |            |                 |       |
|-------------|--------|------------|-----------------|-------|
| <b>pf31</b> | nectar | polyfloral | Bulgaria        | -14.8 |
| <b>ac32</b> | nectar | acacia     | Bulgaria        | -14.6 |
| <b>ac33</b> | nectar | acacia     | Bulgaria        | -14.1 |
| <b>ac34</b> | nectar | acacia     | Bulgaria        | -19.2 |
| <b>ld35</b> | nectar | linden     | Bulgaria        | -16.3 |
| <b>ld36</b> | nectar | linden     | Romania         | -15.8 |
| <b>mx37</b> | mixed  | mixed      | Bulgaria        | -14.4 |
| <b>mx38</b> | mixed  | mixed      | Bulgaria        | -9.3  |
| <b>mx39</b> | mixed  | mixed      | North Macedonia | -15.0 |
| <b>mx40</b> | mixed  | mixed      | Romania         | -11.3 |
| <b>mx41</b> | mixed  | mixed      | Romania         | -35.2 |
| <b>jm42</b> | jam    | jam        | Bulgaria        | +22.7 |

---
